# Supplementary material for: Hepatitis E virus chronic infection of swine co-infected with Porcine Reproductive and Respiratory Syndrome Virus
Source: Vet Res. 2015 Jun 6;46(1):55. doi: 10.1186/s13567-015-0207-y (PMC4456777; doi:10.1186/s13567-015-0207-y)
Supplement: Additional file 1: — HEV serology results on individual sera samples for only-HEV infected pigs [ 25 ]. Optical density (450 nm) values of ELISA test HEV 0.4v per animal at different day post infection. Shaded zones correspond to the period in which individuals were considered HEV seropositive. dpi: days post infection, abs: missing. [file 13567_2015_207_MOESM1_ESM.xlsx]

## Sheet: Additional file 1
	dpi	3	6	7	9	10	13	14	17	20	21	23	24	28	31	34	35	37	38
	Control	abs	0.0975	abs	0.109	abs	0.0795	abs	abs	0.0795	abs	0.131	abs	0.0765	0.0775	0.072	abs	0.15	abs
	Control	abs	0.078	abs	0.0925	abs	0.0715	abs	abs	0.0725	abs	0.131	abs	0.073	0.087	0.0665	abs	0.164	abs
	Control	abs	0.0805	abs	0.091	abs	0.064	abs	abs	0.0715	abs	0.143	abs	0.0675	0.078	0.0615	abs	0.204	abs
	Control	abs	0.0835	abs	0.0975	abs	0.0685	abs	abs	0.071	abs	0.1405	abs	0.00672	0.0645	0.0715	abs	0.169	abs
	Control	0.063	abs	0.06	abs	0.063	abs	0.0885	0.0585	abs	0.0555	abs	0.0785	0.058	0.087	abs	0.0845	abs	0.0665
	Control	0.066	abs	0.0615	abs	0.058	abs	0.089	0.058	abs	0.058	abs	0.075	0.064	0.078	abs	0.0775	abs	0.0655
	Control	0.0725	abs	0.065	abs	0.0695	abs	0.135	0.068	abs	0.0695	abs	0.083	0.0655	0.0745	abs	abs	abs	abs
	Control	0.0785	abs	0.0635	abs	0.063	abs	0.08	0.064	abs	0.059	abs	0.0805	0.068	0.096	abs	0.094	abs	0.071
Group 1	Inoculated	abs	0.079	abs	0.0865	abs	0.0725	abs	abs	0.1315	abs	0.203	abs	0.2775	0.76	0.671	abs	2.318	abs
	Inoculated	abs	0.062	abs	0.082	abs	0.3285	abs	abs	0.582	abs	0.939	abs	3.978	4.099	4.0785	abs	4.056	abs
	Inoculated	abs	0.0685	abs	0.085	abs	0.0795	abs	abs	0.8225	abs	2.629	abs	4.1455	3.9515	3.8285	abs	4.047	abs
	Contact	abs	0.0785	abs	0.101	abs	0.074	abs	abs	0.0835	abs	0.1275	abs	0.073	0.3905	0.4605	abs	3.564	abs
	Contact	abs	0.0725	abs	0.094	abs	0.0705	abs	abs	0.073	abs	0.1225	abs	0.0625	0.073	0.0675	abs	1.301	abs
	Contact	abs	0.0805	abs	0.0815	abs	0.0645	abs	abs	0.07	abs	0.1275	abs	0.155	0.736	1.31	abs	4.079	abs
Group 2	Inoculated	abs	0.0645	abs	0.084	abs	0.0645	abs	abs	0.1855	abs	0.2705	abs	0.247	0.2455	0.406	abs	1.512	abs
	Inoculated	abs	0.074	abs	0.0935	abs	0.074	abs	abs	0.079	abs	0.134	abs	0.0755	0.077	0.0885	abs	0.24	abs
	Inoculated	abs	0.0605	abs	0.0825	abs	0.0655	abs	abs	0.1755	abs	0.209	abs	0.307	0.342	0.4485	abs	0.4825	abs
	Contact	abs	0.08	abs	0.0835	abs	0.0735	abs	abs	0.071	abs	0.126	abs	0.073	0.1	0.1455	abs	1.757	abs
	Contact	abs	0.091	abs	0.096	abs	0.077	abs	abs	0.0865	abs	0.118	abs	0.075	0.1395	0.1155	abs	1.847	abs
	Contact	abs	0.07	abs	0.0925	abs	0.0705	abs	abs	0.074	abs	0.1305	abs	0.07	0.0735	0.0615	abs	0.188	abs
Group 3	Inoculated	abs	0.0625	abs	0.0825	abs	0.062	abs	abs	0.07	abs	0.1315	abs	0.0675	0.0755	0.1095	abs	0.207	abs
	Inoculated	abs	0.0665	abs	0.087	abs	0.063	abs	abs	0.078	abs	0.146	abs	0.139	0.184	0.265	abs	1.072	abs
	Inoculated	abs	0.074	abs	0.093	abs	0.0675	abs	abs	0.425	abs	0.5275	abs	1.1945	0.993	0.7495	abs	2.5	abs
	Contact	abs	0.0695	abs	0.0855	abs	0.0655	abs	abs	0.0636	abs	0.1285	abs	0.07	0.1015	0.0645	abs	0.479	abs
	Contact	abs	0.0685	abs	0.092	abs	0.0685	abs	abs	0.0605	abs	0.12	abs	0.069	0.118	0.1845	abs	4.061	abs
	Contact	abs	0.088	abs	0.097	abs	0.0735	abs	abs	0.067	abs	0.1305	abs	0.075	0.087	0.0685	abs	3.626	abs
Group 4	Inoculated	abs	0.062	abs	0.071	abs	0.0655	abs	abs	0.2355	abs	0.236	abs	0.2115	0.4035	0.421	abs	1.157	abs
	Inoculated	abs	0.07	abs	0.069	abs	0.065	abs	abs	0.26	abs	0.3195	abs	0.252	0.448	0.584	abs	1.241	abs
	Inoculated	abs	0.0705	abs	0.085	abs	0.0715	abs	abs	1.284	abs	0.9535	abs	1.4765	2.728	1.8135	abs	4.056	abs
	Contact	abs	0.075	abs	0.0835	abs	0.0625	abs	abs	0.071	abs	0.9385	abs	0.449	0.249	0.196	abs	0.935	abs
	Contact	abs	0.072	abs	0.082	abs	0.058	abs	abs	0.0775	abs	0.1355	abs	0.07	0.0735	0.066	abs	0.355	abs
	Contact	abs	0.071	abs	0.08	abs	0.0605	abs	abs	0.066	abs	0.234	abs	0.069	0.062	0.0595	abs	1.044	abs
Group 5	Inoculated	0.068	abs	0.058	abs	0.0575	abs	0.083	0.0575	abs	0.2755	abs	0.204	0.179	0.1305	abs	0.146	abs	0.1395
	Inoculated	0.068	abs	0.058	abs	0.0565	abs	0.0885	0.0635	abs	0.0745	abs	0.1875	0.2795	0.4175	abs	0.618	abs	0.806
	Inoculated	0.07	abs	0.0655	abs	0.063	abs	0.0905	0.0985	abs	0.1115	abs	0.156	0.182	0.2405	abs	0.299	abs	0.302
	Contact	0.078	abs	0.066	abs	0.058	abs	0.085	0.0555	abs	0.057	abs	0.0795	0.069	0.087	abs	0.108	abs	0.08
	Contact	0.0725	abs	0.06	abs	0.0605	abs	0.0845	0.053	abs	0.057	abs	0.079	0.057	0.0755	abs	0.083	abs	0.075
	Contact	0.073	abs	0.061	abs	0.0525	abs	0.0865	0.0535	abs	0.0555	abs	0.075	0.0645	0.0805	abs	0.1485	abs	0.063
Group 6	Inoculated	0.071	abs	0.067	abs	0.0685	abs	0.0945	0.0565	abs	0.105	abs	0.4	0.4025	0.1465	abs	0.1595	abs	0.1595
	Inoculated	0.08	abs	0.0695	abs	0.061	abs	0.0875	0.1095	abs	0.2205	abs	0.1845	0.1775	0.2305	abs	0.3485	abs	0.3105
	Inoculated	0.075	abs	0.0595	abs	0.0595	abs	0.0865	0.0925	abs	0.164	abs	0.2535	0.201	0.2275	abs	0.369	abs	0.2795
	Contact	0.066	abs	0.065	abs	0.065	abs	0.09	0.059	abs	0.063	abs	0.071	0.068	0.138	abs	1.1175	abs	0.5615
	Contact	0.075	abs	0.066	abs	0.0535	abs	0.08	0.0515	abs	0.055	abs	0.0745	0.0685	0.1225	abs	0.5675	abs	0.3715
	Contact	0.071	abs	0.06	abs	0.0565	abs	0.083	0.056	abs	0.056	abs	0.073	0.066	0.092	abs	0.121	abs	0.1125
